# Supplementary material for: Morbid obesity in Taiwan: Prevalence, trends, associated social demographics, and lifestyle factors
Source: PubMed Central journal article supplement (PMC5289420; doi:10.1371/journal.pone.0169577), 2017-02-02
Supplement: pone.0169577.s001.pdf [file pone.0169577.s001.pdf]

## Supporting Information

### Appendix S1. Definition of adults' metabolic risk factors in Taiwan

Metabolic syndrome was defined when 3 of the following 5 components were fulfilled[1]: central obesity (waist circumference  $\geq 90$  cm for male and  $\geq 80$  cm for female), impaired fasting glucose (FG) ( $\geq 100$  mg/dL), hypertriglyceridemia (triglyceride, TG  $\geq 150$  mg/dL), decreased serum high-density lipoprotein (HDL-C) ( $< 40$  mg/dL in males and  $< 50$  mg/dL in females), and elevated blood pressure (systolic blood pressure, SBP  $\geq 130$  mmHg or diastolic blood pressure, DBP  $\geq 85$  mmHg). Further clinical chemistry definitions include hypercholesterolemia (total cholesterol, TC  $\geq 220$  mg/dL), elevated low-density lipoprotein cholesterol (LDL-C) ( $\geq 130$  mg/dL) and hyperuricemia (uric acid, UA  $\geq 7$  mg/dL for male and  $\geq 6$  mg/dL for female).

**Table A. Definition of adults' obesity in Taiwan.**

| Category         | BMI (kg/m <sup>2</sup> )    |
|------------------|-----------------------------|
| Underweight      | BMI<18.5                    |
| Normal weight    | 18.5≤BMI<24                 |
| Overweight       | 24≤BMI<27                   |
| Obesity (BMI≥27) | Mild obesity: 27≤BMI<30     |
|                  | Moderate obesity: 30≤BMI<35 |
|                  | Morbid obesity: BMI≥35      |

BMI: body mass index.

BMI was defined as weight (kg) divided by height square (m<sup>2</sup>). According to the Taiwan Ministry of Health and Welfare[2], the cut-offs value for overweight and obesity are lower than those from WHO.

**Table B. Anthropometric and biochemical characteristics of the normal weight and the morbid obesity groups.**

| Characteristics <sup>a</sup> | Normal Weight <sup>b</sup> |                 | Morbid Obesity <sup>b</sup> |                 | <i>P</i> <sup>c</sup> |
|------------------------------|----------------------------|-----------------|-----------------------------|-----------------|-----------------------|
|                              | (18.5≤BMI<24)              |                 | (BMI≥35)                    |                 |                       |
|                              | n=156                      |                 | n=39                        |                 |                       |
| Waist Circumference (cm)     | 74.1                       | (69.5 - 79.5)   | 112.5                       | (103.0 - 118.3) | <0.0001 <sup>†</sup>  |
| Central Obesity (%)          | 9.7                        |                 | 100.0                       |                 | <0.0001 <sup>‡</sup>  |
| Hip Circumference (cm)       | 91.6                       | (88.0 - 95.5)   | 117.8                       | (113.2 - 122.8) | <0.0001 <sup>†</sup>  |
| FG (mg/dl)                   | 93.0                       | (89.0 - 99.0)   | 105.5                       | (95.5 - 113.0)  | <0.0001 <sup>†</sup>  |
| Impaired FG (%)              | 24.0                       |                 | 69.4                        |                 | <0.0001 <sup>‡</sup>  |
| TG (mg/dl)                   | 77.5                       | (55.0 - 103.5)  | 124.0                       | (97.0 - 172.5)  | <0.0001 <sup>†</sup>  |
| Hyper TG (%)                 | 9.2                        |                 | 36.1                        |                 | <0.0001 <sup>‡</sup>  |
| TC (mg/dl)                   | 180.0                      | (157.0 - 207.0) | 185.0                       | (168.0 - 214.0) | 0.1894 <sup>†</sup>   |
| Hypercholesterolemia (%)     | 14.4                       |                 | 22.2                        |                 | 0.2466 <sup>‡</sup>   |
| HDL-C (mg/dl)                | 58.0                       | (50.0 - 68.0)   | 43.5                        | (38.0 - 56.0)   | <0.0001 <sup>†</sup>  |
| Reduced HDL-C (%)            | 15.7                       |                 | 52.8                        |                 | <0.0001 <sup>‡</sup>  |
| LDL-C (mg/dl)                | 111.0                      | (90.0 - 135.0)  | 119.0                       | (100.5 - 139.0) | 0.1051 <sup>†</sup>   |
| Hyper LDL-C (%)              | 30.7                       |                 | 33.3                        |                 | 0.7607 <sup>‡</sup>   |
| SBP (mmHg)                   | 107.0                      | (99.0 - 116.0)  | 128.8                       | (113.0 - 137.0) | <0.0001 <sup>†</sup>  |
| DBP (mmHg)                   | 68.0                       | (62.0 - 73.0)   | 79.0                        | (71.0 - 87.3)   | <0.0001 <sup>†</sup>  |
| Elevated BP (%)              | 3.9                        |                 | 52.6                        |                 | <0.0001 <sup>‡</sup>  |
| Metabolic Syndrome (%)       | 5.1                        |                 | 66.7                        |                 | <0.0001 <sup>‡</sup>  |
| UA (mg/dl)                   | 5.1                        | (4.2 - 6.1)     | 6.6                         | (5.5 - 7.4)     | <0.0001 <sup>†</sup>  |
| Hyperuricemia (%)            | 19.0                       |                 | 61.1                        |                 | <0.0001 <sup>‡</sup>  |

<sup>a</sup> BMI: body mass index; TG: triglyceride; TC: total cholesterol;

HDL-C: high-density lipoprotein; LDL-C: low-density lipoprotein; FG: fasting glucose;

SBP: systolic blood pressure; DBP: diastolic blood pressure; UA: uric acid.

<sup>b</sup> Median and interquartile range (25th -75th percentile) or prevalence (%).

<sup>c</sup> The case and control groups were compared with either Mann-Whitney U test(†) or Chi-square test(‡).

As expected, MO cases had significantly ( $p < 0.0001$ ) higher levels of waist and hip circumferences, FG, TG, SBP, DBP and UA and lower level of HDL-C than NW controls. The proportion with metabolic syndrome was also much higher in MO cases than in NW controls (66.7% vs. 5.1%) ( $p < 0.0001$ ).

**Table C. Factor loading and correlation coefficient of 21 food categories.**

| 21 Food categories                  | Factor loading <sup>a</sup> | Correlation Coefficient <sup>b</sup> | p <sup>c</sup> |
|-------------------------------------|-----------------------------|--------------------------------------|----------------|
| Ice pop, candy, Sweetern beveverage | 0.42                        | 0.68                                 | <0.0001        |
| Red Meat                            | 0.24                        | 0.30                                 | <0.0001        |
| Egg                                 | 0.19                        | 0.05                                 | 0.5117         |
| Processed seafood & meat products   | 0.17                        | 0.28                                 | 0.0002         |
| Pickel Vegetables                   | 0.09                        | 0.11                                 | 0.1347         |
| Poultry                             | 0.08                        | 0.17                                 | 0.0202         |
| Roe and innards                     | 0.06                        | 0.11                                 | 0.1523         |
| Rice milk                           | 0.03                        | 0.05                                 | 0.5060         |
| Soybean products                    | 0.00                        | -0.04                                | 0.5881         |
| Flavored creamy dairy products      | -0.06                       | 0.01                                 | 0.9115         |
| Vegetables                          | -0.07                       | -0.26                                | 0.0003         |
| Seafood                             | -0.09                       | -0.15                                | 0.0384         |
| Herbal tea                          | -0.13                       | 0.00                                 | 0.9609         |
| Tea Coffee (no sugar)               | -0.16                       | -0.38                                | <0.0001        |
| Breakfast cereals                   | -0.20                       | -0.28                                | 0.0001         |
| Sweetened starchy bean products     | -0.22                       | -0.04                                | 0.6050         |
| Milks, Ypgurts, Cheese              | -0.28                       | -0.41                                | <0.0001        |
| Rice & Noodle Products              | -0.32                       | -0.13                                | 0.0926         |
| Roots & Tubers                      | -0.34                       | -0.15                                | 0.0512         |
| Nuts                                | -0.35                       | -0.25                                | 0.0007         |
| Fresh fruit & 100% juice            | -0.36                       | -0.52                                | <0.0001        |

<sup>a</sup> The factor loading was calculated by reduced rank regression (RRR).

<sup>b</sup> The correlation coefficient between food frequency and dietary pattern score was calculated by Spearman correlation.

<sup>c</sup> The case and control group were compared by using Mann-Whitney U test.

In this study, we have grouped 72 original food items into 21 food categories by food groups and nutrient density. In this table we show the detailed results of 21 food categories form RRR. And the correlation between intake frequency per month of 21 food categories and dietary pattern score.

## Reference

1. Health Promotion Administration (HPA) MoHaWM. Definition of adults metabolic syndrome in Taiwan.: Health Promotion Administration (HPA), Ministry of Health and Welfare (MOHFW); 2007 [updated 30/01; cited 2016 March]. Available from:

<http://www.hpa.gov.tw/BHPNet/Web/HealthTopic/TopicArticle.aspx?No=200712250123&parentid=200712250023>.

2. (DOH) DoH. Definition of adults obesity in Taiwan Department of Health, Executive Yuan: Department of Health (DOH), Executive Yuan; 2007 [cited 2016 March]. Available from: <http://health99.hpa.gov.tw/OnlinkHealth/BMI.html>.
